# Supplementary material for: Transgenerational effects of UV-B radiation on egg size, fertilization, hatching and larval size of sea urchins Strongylocentrotus intermedius
Source: PeerJ. 2019 Aug 26;7:e7598. doi: 10.7717/peerj.7598 (PMC6714959; doi:10.7717/peerj.7598)
Supplement: Supplemental Information 1 [file peerj-07-7598-s001.xlsx]

## Sheet: Egg size
Treatment	Ind	Egg size (observed)	Egg size (adjusted)
1	1	94.44	85.8545
1	2	100.42	91.2909
1	3	98.92	89.9273
1	4	98.92	89.9273
1	5	101.92	92.6545		Treatment 1：（♀0um.cm-2 ×♂0um.cm-2）；treatment 2：（♀20um.cm-2 ×♂20um.cm-2）；treatment 3：（♀20um.cm-2 ×♂0um.cm-2）
1	6	100.42	91.2909
1	7	101.92	92.6545		Egg size (adjusted) =Egg size (observed)*50\55
1	8	100.42	91.2909
1	9	101.92	92.6545
1	10	98.92	89.9273
1	11	89.93	81.7545
1	12	94.43	85.8455
1	13	95.93	87.2091
1	14	100.42	91.2909
1	15	103.42	94.0182
1	16	91.43	83.1182
1	17	103.42	94.0182
1	18	98.92	89.9273
1	19	97.42	88.5636
1	20	101.92	92.6545
1	21	97.42	88.5636
1	22	95.93	87.2091
1	23	97.42	88.5636
1	24	100.42	91.2909
1	25	95.93	87.2091
1	26	98.92	89.9273
1	27	98.92	89.9273
1	28	95.93	87.2091
1	29	103.42	94.0182
1	30	97.42	88.5636
2	1	98.92	89.9273
2	2	98.92	89.9273
2	3	97.42	88.5636
2	4	97.42	88.5636
2	5	101.92	92.6545
2	6	97.42	88.5636
2	7	103.42	94.0182
2	8	101.92	92.6545
2	9	100.42	91.2909
2	10	101.92	92.6545
2	11	100.42	91.2909
2	12	100.42	91.2909
2	13	95.93	87.2091
2	14	103.42	94.0182
2	15	100.42	91.2909
2	16	103.42	94.0182
2	17	101.92	92.6545
2	18	98.92	89.9273
2	19	98.92	89.9273
2	20	101.92	92.6545
2	21	98.92	89.9273
2	22	101.92	92.6545
2	23	98.92	89.9273
2	24	100.42	91.2909
2	25	100.42	91.2909
2	26	100.42	91.2909
2	27	103.42	94.0182
2	28	101.92	92.6545
2	29	98.92	89.9273
2	30	103.42	94.0182
3	1	104.82	95.2909
3	2	103.42	94.0182
3	3	103.42	94.0182
3	4	104.92	95.3818
3	5	106.42	96.7455
3	6	101.92	92.6545
3	7	106.42	96.7455
3	8	101.92	92.6545
3	9	100.42	91.2909
3	10	98.92	89.9273
3	11	100.42	91.2909
3	12	101.92	92.6545
3	13	103.42	94.0182
3	14	103.42	94.0182
3	15	98.92	89.9273
3	16	103.42	94.0182
3	17	101.92	92.6545
3	18	100.42	91.2909
3	19	103.42	94.0182
3	20	103.42	94.0182
3	21	103.42	94.0182
3	22	101.92	92.6545
3	23	110.92	100.836
3	24	107.92	98.1091
3	25	106.42	96.7455
3	26	106.42	96.7455
3	27	101.92	92.6545
3	28	101.92	92.6545
3	29	109.41	99.4636
3	30	106.42	96.7455
