# Supplementary material for: Transgenerational effects of UV-B radiation on egg size, fertilization, hatching and larval size of sea urchins Strongylocentrotus intermedius
Source: PeerJ. 2019 Aug 26;7:e7598. doi: 10.7717/peerj.7598 (PMC6714959; doi:10.7717/peerj.7598)
Supplement: Supplemental Information 3 [file peerj-07-7598-s003.xlsx]

## Sheet: Sheet1
Treatment	Replicate	Ind	Sex	Developmental stage
1	1	1	♀	4
1	1	2	♂	1
1	1	3	♀	1
1	1	4	♂	1
1	1	5	♂	2
1	1	6	♀	1			Treatment 1: 0μm.cm-2 ; Treatment 2: 20μm.cm-2
1	1	7	♀	4
1	1	8	♂	2
1	1	9	♂	2
1	1	10	♀	4
1	2	1	♀	4
1	2	2	♂	1
1	2	3	♀	4
1	2	4	♂	1
1	2	5	♀	4
1	2	6	♂	2
1	2	7	♂	4
1	2	8	♀	4
1	2	9	♂	2
1	2	10	♀	4
1	3	1	♀	4
1	3	2	♀	4
1	3	3	♂	2
1	3	4	♀	4
1	3	5	♀	4
1	3	6	♂	1
1	3	7	♀	4
1	3	8	♀	4
1	3	9	♂	2
1	3	10	♀	4
2	1	1	♀	1
2	1	2	♀	4
2	1	3	♂	2
2	1	4	♂	1
2	1	5	♀	4
2	1	6	♂	2
2	1	7	♂	1
2	1	8	♂	4
2	1	9	♀	3
2	1	10	♀	4
2	2	1	♂	2
2	2	2	♂	3
2	2	3	♂	3
2	2	4	♂	2
2	2	5	♀	4
2	2	6	♀	4
2	2	7	♀	4
2	2	8	♂	2
2	2	9	♀	1
2	2	10	♀	4
2	3	1	♀	4
2	3	2	♀	3
2	3	3	♀	4
2	3	4	♂	1
2	3	5	♂	2
2	3	6	♂	2
2	3	7	♀	4
2	3	8	♀	1
2	3	9	♀	4
2	3	10	♀	4
