# Supplementary material for: Transgenerational effects of UV-B radiation on egg size, fertilization, hatching and larval size of sea urchins Strongylocentrotus intermedius
Source: PeerJ. 2019 Aug 26;7:e7598. doi: 10.7717/peerj.7598 (PMC6714959; doi:10.7717/peerj.7598)
Supplement: Supplemental Information 4 [file peerj-07-7598-s004.xlsx]

## Sheet: body size
Treatment	Replicate	Ind	Observed values						Adjusted values
			Larval length	Larval width	Stomach length	Stomach width	Body rod length	Post-oral arm length	Larval length	Larval width	Stomach length	Stomach width	Body rod length	Post-oral arm length	Post-oral arm length/body rod length
1	1	1	165.51	77.78	38.95	31.3	34.53	131.77	384.907	180.884	90.5814	72.7907	306.442	80.3023	0.262048
1	1	2	167.82	75.91	40.52	28.62	28.15	137.63	390.279	176.535	94.2326	66.5581	320.07	65.4651	0.204534
1	1	3	178.37	73.5	35.23	29.15	38.56	136.97	414.814	170.93	81.9302	67.7907	318.535	89.6744	0.281522	Treatment 1：（♀0um.cm-2 ×♂0um.cm-2）；Treatment 2：（♀20um.cm-2 ×♂20um.cm-2）；Treatment 3：（♀20um.cm-2 ×♂0um.cm-2）
1	1	4	178.44	70.58	43	29.07	25	147.34	414.977	164.14	100	67.6047	342.651	58.1395	0.169676
1	1	5	177.73	73.74	43.57	29.21	41.44	133.99	413.326	171.488	101.326	67.9302	311.605	96.3721	0.309277	Adjusted values = observed values*50\21.5
1	1	6	178.17	73.01	43	31.26	36.8	132.44	414.349	169.791	100	72.6977	308	85.5814	0.277862
1	1	7	162.79	76.49	38.01	26.17	35.85	125.72	378.581	177.884	88.3953	60.8605	292.372	83.3721	0.285157
1	1	8	162.93	78.16	32.45	22.83	28.3	129.71	378.907	181.767	75.4651	53.093	301.651	65.814	0.218179
1	1	9	173.11	68.24	36.07	29.07	34.44	132.88	402.581	158.698	83.8837	67.6047	309.023	80.093	0.259181
1	1	10	169.5	70.71	37.05	31.06	33.53	131.4	394.186	164.442	86.1628	72.2326	305.581	77.9767	0.255175
1	1	11	169.58	72.18	37.34	36.01	32.25	133.75	394.372	167.86	86.8372	83.7442	311.047	75	0.241121
1	1	12	181.07	68.12	36.5	19	28.3	145.43	421.093	158.419	84.8837	44.186	338.209	65.814	0.194595
1	1	13	167.72	71.28	41.68	26.4	33.54	130.23	390.047	165.767	96.9302	61.3953	302.86	78	0.257544
1	1	14	168.13	74.33	42.52	33.42	34.44	129.28	391	172.86	98.8837	77.7209	300.651	80.093	0.266399
1	1	15	172.72	67.05	35.47	30.08	36.4	138.24	401.674	155.93	82.4884	69.9535	321.488	84.6512	0.26331
1	1	16	173.35	70.46	37.34	29.07	38.12	137.06	403.14	163.86	86.8372	67.6047	318.744	88.6512	0.278126
1	1	17	174.66	67.27	34.93	20.1	29.83	147.87	406.186	156.442	81.2326	46.7442	343.884	69.3721	0.201731
1	1	18	159.4	71	31.76	24.17	27.46	134.18	370.698	165.116	73.8605	56.2093	312.047	63.8605	0.20465
1	1	19	181.42	75.92	48.04	33.63	46.07	130.01	421.907	176.558	111.721	78.2093	302.349	107.14	0.354357
1	1	20	182.29	77.19	39.65	33.53	40.77	137.99	423.93	179.512	92.2093	77.9767	320.907	94.814	0.295456
1	1	21	179.74	76.49	40.25	26	40.8	137.22	418	177.884	93.6047	60.4651	319.116	94.8837	0.297333
1	1	22	187.54	73.37	30.5	26.5	36.67	136.56	436.14	170.628	70.9302	61.6279	317.581	85.2791	0.268527
1	1	23	175	75.01	41.68	32.87	43.19	127.66	406.977	174.442	96.9302	76.4419	296.884	100.442	0.338321
1	1	24	188.18	63.67	37.01	32.9	38.83	137.17	437.628	148.07	86.0698	76.5116	319	90.3023	0.283079
1	1	25	171.97	75.45	42.19	29.35	34.71	125.96	399.93	175.465	98.1163	68.2558	292.93	80.7209	0.275564
1	1	26	183.37	75.85	32.53	26.5	40.14	139.51	426.442	176.395	75.6512	61.6279	324.442	93.3488	0.287721
1	1	27	181	76.89	35.53	29.73	38.33	148.66	420.93	178.814	82.6279	69.1395	345.721	89.1395	0.257837
1	1	28	182.4	67.96	39.54	29.43	30.21	142.8	424.186	158.047	91.9535	68.4419	332.093	70.2558	0.211555
1	1	29	169.33	69.43	36.27	25.71	39.05	123.41	393.791	161.465	84.3488	59.7907	287	90.814	0.316425
1	1	30	179.62	67.33	37.05	28.11	35.29	138.24	417.721	156.581	86.1628	65.3721	321.488	82.0698	0.255281
1	1	31	175.8	65.3	39.54	34.5	38.16	132.01	408.837	151.86	91.9535	80.2326	307	88.7442	0.289069
1	1	32	172	71.06	33.63	26.42	38.9	135.03	400	165.256	78.2093	61.4419	314.023	90.4651	0.288084
1	1	33	176.9	76.9	35.56	28.23	36.62	146.73	411.395	178.837	82.6977	65.6512	341.233	85.1628	0.249574
1	1	34	183.63	64.47	29.3	26.74	33.42	146.6	427.047	149.93	68.1395	62.186	340.93	77.7209	0.227967
1	1	35	173.1	74.06	43.29	34.03	36.69	141.8	402.558	172.233	100.674	79.1395	329.767	85.3256	0.258745
1	1	36	181.59	75.9	38.47	31.62	37.66	134.73	422.302	176.512	89.4651	73.5349	313.326	87.5814	0.279522
1	1	37	164.55	69.92	35.34	25.74	30.61	130.1	382.674	162.605	82.186	59.8605	302.558	71.186	0.235281
1	1	38	192.88	78.6	37.61	28.84	41.3	149.37	448.558	182.791	87.4651	67.0698	347.372	96.0465	0.276495
1	1	39	165.11	80.41	39.7	30	24.47	138.76	383.977	187	92.3256	69.7674	322.698	56.907	0.176348
1	1	40	170.22	61.95	37.59	29.6	41.5	131.34	395.86	144.07	87.4186	68.8372	305.442	96.5116	0.315974
1	1	41	176.57	75.04	32.73	27.83	38.95	133.03	410.628	174.512	76.1163	64.7209	309.372	90.5814	0.292791
1	1	42	169.14	77.01	37.58	25.55	28.16	126.26	393.349	179.093	87.3953	59.4186	293.628	65.4884	0.223032
1	1	43	191.24	67.1	27.93	28.43	37.83	140.27	444.744	156.047	64.9535	66.1163	326.209	87.9767	0.269694
1	1	44	182.58	79.71	42.74	28.16	26.8	148.53	424.605	185.372	99.3953	65.4884	345.419	62.3256	0.180435
1	1	45	164.92	68.41	35.92	19.7	40.75	118.29	383.535	159.093	83.5349	45.814	275.093	94.7674	0.344492
1	1	46	171.84	72.84	44.91	33.31	45.64	126.17	399.628	169.395	104.442	77.4651	293.419	106.14	0.361734
1	1	47	177.92	76.42	41.59	29.51	43.86	135.99	413.767	177.721	96.7209	68.6279	316.256	102	0.322524
1	1	48	171.77	67.08	35.09	20.94	24.55	144.01	399.465	156	81.6047	48.6977	334.907	57.093	0.170474
1	1	49	190.68	73.35	41.8	31.78	38.73	147.23	443.442	170.581	97.2093	73.907	342.395	90.0698	0.263058
1	1	50	178.81	72.79	39.08	28.97	26.4	152.58	415.837	169.279	90.8837	67.3721	354.837	61.3953	0.173024
1	2	1	156.4	62.01	32.45	23.85	28.6	118.8	363.721	144.209	75.4651	55.4651	276.279	66.5116	0.240741
1	2	2	183.2	70.21	31.76	29.07	40.16	149.94	426.047	163.279	73.8605	67.6047	348.698	93.3953	0.26784
1	2	3	174.98	71.7	41.15	34.67	36.06	127.94	406.93	166.744	95.6977	80.6279	297.535	83.8605	0.281851
1	2	4	163.81	70.49	37.12	24.19	28.32	128.04	380.953	163.93	86.3256	56.2558	297.767	65.8605	0.221181
1	2	5	189.03	54.78	28.86	25.96	38.01	149.88	439.605	127.395	67.1163	60.3721	348.558	88.3953	0.253603
1	2	6	180.94	82.86	43.43	33.54	43.01	147.28	420.791	192.698	101	78	342.512	100.023	0.292029
1	2	7	179.61	77.67	48.41	40.31	45.22	145.21	417.698	180.628	112.581	93.7442	337.698	105.163	0.311411
1	2	8	180.42	72.35	36.88	32.56	38.08	149.83	419.581	168.256	85.7674	75.7209	348.442	88.5581	0.254155
1	2	9	160.37	69.29	30.87	18.6	43.29	117.24	372.953	161.14	71.7907	43.2558	272.651	100.674	0.369243
1	2	10	170.05	80.02	41	37.01	52.95	124.95	395.465	186.093	95.3488	86.0698	290.581	123.14	0.42377
1	2	11	195	79	43.14	37.58	50.01	141	453.488	183.721	100.326	87.3953	327.907	116.302	0.354681
1	2	12	176.18	74.95	40.31	37.44	38.95	133.81	409.721	174.302	93.7442	87.0698	311.186	90.5814	0.291084
1	2	13	170.42	70.71	46.01	39.01	33.24	132.61	396.326	164.442	107	90.7209	308.395	77.3023	0.25066
1	2	14	172.54	72.37	40.5	22.47	37.12	148.03	401.256	168.302	94.186	52.2558	344.256	86.3256	0.25076
1	2	15	167.92	73.74	33.84	24.17	42.49	137.8	390.512	171.488	78.6977	56.2093	320.465	98.814	0.308345
1	2	16	154	82.39	33.06	21.38	34.48	128.75	358.14	191.605	76.8837	49.7209	299.419	80.186	0.267806
1	2	17	168.01	74.43	39.82	23.6	34.06	130.42	390.721	173.093	92.6047	54.8837	303.302	79.2093	0.261156
1	2	18	138.05	65.79	37.54	37.64	44.38	127.22	321.047	153	87.3023	87.5349	295.86	103.209	0.348845
1	2	19	145.58	72.62	32.14	19.03	29.12	121.75	338.558	168.884	74.7442	44.2558	283.14	67.7209	0.239179
1	2	20	173.22	71.59	28.28	20.02	25	131.47	402.837	166.488	65.7674	46.5581	305.744	58.1395	0.190157
1	2	21	143.89	84.72	39.2	35.36	36.5	115.85	334.628	197.023	91.1628	82.2326	269.419	84.8837	0.315063
1	2	22	168.32	80.53	43.46	31.95	38.21	149.81	391.442	187.279	101.07	74.3023	348.395	88.8605	0.255056
1	2	23	151.79	72.53	29.15	21.02	26	126.19	353	168.674	67.7907	48.8837	293.465	60.4651	0.206039
1	2	24	149.25	68.15	37.34	35.34	28.02	133.54	347.093	158.488	86.8372	82.186	310.558	65.1628	0.209825
1	2	25	165.01	77.47	34.13	35.38	38.95	147.3	383.744	180.163	79.3721	82.2791	342.558	90.5814	0.264426
1	2	26	172.15	71.06	38.33	37.05	40.36	145.91	400.349	165.256	89.1395	86.1628	339.326	93.8605	0.276609
1	2	27	161.9	78.71	41.01	26.08	38.95	143.56	376.512	183.047	95.3721	60.6512	333.86	90.5814	0.271315
1	2	28	160.7	72.12	37.48	28.02	24.6	146.63	373.721	167.721	87.1628	65.1628	341	57.2093	0.167769
1	2	29	159.42	79.7	38.01	22.47	34.53	125.16	370.744	185.349	88.3953	52.2558	291.07	80.3023	0.275887
1	2	30	158.94	68.1	40.79	29.15	41.11	129.19	369.628	158.372	94.8605	67.7907	300.442	95.6047	0.318213
1	2	31	168.4	75.17	40.31	25.94	38.01	125.3	391.628	174.814	93.7442	60.3256	291.395	88.3953	0.303352
1	2	32	148.81	73.43	38.91	26.68	36.88	122.33	346.07	170.767	90.4884	62.0465	284.488	85.7674	0.30148
1	2	33	166.33	73.54	29.7	29.21	40.46	131.89	386.814	171.023	69.0698	67.9302	306.721	94.093	0.306771
1	2	34	181.2	70.84	29.53	20.52	42.95	141.77	421.395	164.744	68.6744	47.7209	329.698	99.8837	0.302955
1	2	35	158.15	63.89	37.12	30.15	41.76	146.25	367.791	148.581	86.3256	70.1163	340.116	97.1163	0.285538
1	2	36	156.92	78.06	39.05	36.06	48.51	124.74	364.93	181.535	90.814	83.8605	290.093	112.814	0.388889
1	2	37	166.21	74	34.99	30.46	31.06	136.37	386.535	172.093	81.3721	70.8372	317.14	72.2326	0.227763
1	2	38	185.06	62.77	42.43	27.17	42.3	147.28	430.372	145.977	98.6744	63.186	342.512	98.3721	0.287208
1	2	39	165.15	76.03	40.31	36	32.89	134.26	384.07	176.814	93.7442	83.7209	312.233	76.4884	0.244972
1	2	40	172.35	67.9	37.01	42.01	36.69	136.57	400.814	157.907	86.0698	97.6977	317.605	85.3256	0.268653
1	2	41	162.2	71.34	38.28	26.4	40.8	133.69	377.209	165.907	89.0233	61.3953	310.907	94.8837	0.305184
1	2	42	163.69	73.79	34.93	21.21	40.36	147.2	380.674	171.605	81.2326	49.3256	342.326	93.8605	0.274185
1	2	43	185.15	72.95	31.14	34.41	47.38	142.27	430.581	169.651	72.4186	80.0233	330.86	110.186	0.333029
1	2	44	165.48	73.24	33.62	38.9	35.44	137.57	384.837	170.326	78.186	90.4651	319.93	82.4186	0.257614
1	2	45	180.04	70.46	34	32	41.11	152.07	418.698	163.86	79.0698	74.4186	353.651	95.6047	0.270336
1	2	46	183.83	69.31	31.11	29.73	42.72	150.95	427.512	161.186	72.3488	69.1395	351.047	99.3488	0.283008
1	2	47	184	65.12	35.06	36.06	50.09	137.06	427.907	151.442	81.5349	83.8605	318.744	116.488	0.36546
1	2	48	167.33	71.31	39.85	37.36	51.04	130.05	389.14	165.837	92.6744	86.8837	302.442	118.698	0.392464
1	2	49	191.16	69.18	43.42	37.58	44.41	153	444.558	160.884	100.977	87.3953	355.814	103.279	0.290261
1	2	50	155.18	76.03	32.65	19.85	38.08	121.04	360.884	176.814	75.9302	46.1628	281.488	88.5581	0.314607
1	3	1	146.11	77.16	33.38	34.71	39.45	122.64	339.791	179.442	77.6279	80.7209	285.209	91.7442	0.321673
1	3	2	169.5	68.54	35.69	23.77	41.62	138.23	394.186	159.395	83	55.2791	321.465	96.7907	0.301092
1	3	3	171.12	75.43	55.54	29.02	36.25	168.76	397.953	175.419	129.163	67.4884	392.465	84.3023	0.214802
1	3	4	149.12	66.37	35.61	31.14	43.42	128.13	346.791	154.349	82.814	72.4186	297.977	100.977	0.338875
1	3	5	159.15	67.12	34.89	24.7	41.18	131.53	370.116	156.093	81.1395	57.4419	305.884	95.7674	0.313084
1	3	6	166.43	69.2	47.43	25.61	37.66	127.01	387.047	160.93	110.302	59.5581	295.372	87.5814	0.296512
1	3	7	155.72	67.19	34.99	27.59	38.08	134.13	362.14	156.256	81.3721	64.1628	311.93	88.5581	0.283904
1	3	8	172.29	75.31	44.15	35.9	45.01	141.01	400.674	175.14	102.674	83.4884	327.93	104.674	0.319197
1	3	9	152.12	76.49	40.02	19.65	36.69	116.21	353.767	177.884	93.0698	45.6977	270.256	85.3256	0.315722
1	3	10	166.81	78.26	34.06	22	45	127.8	387.93	182	79.2093	51.1628	297.209	104.651	0.352113
1	3	11	166.98	63.25	46.75	26.42	47.68	123.48	388.326	147.093	108.721	61.4419	287.163	110.884	0.386135
1	3	12	151.4	72.01	30.08	14.42	42.95	103.08	352.093	167.465	69.9535	33.5349	239.721	99.8837	0.416667
1	3	13	174.18	73.57	53.54	25.5	47.38	139.27	405.07	171.093	124.512	59.3023	323.884	110.186	0.340202
1	3	14	172.29	75.96	38.21	27.66	38.08	146.84	400.674	176.651	88.8605	64.3256	341.488	88.5581	0.25933
1	3	15	186.3	70.71	35.23	27.29	40.79	138.19	433.256	164.442	81.9302	63.4651	321.372	94.8605	0.295173
1	3	16	164.78	72.03	41.68	26.91	42.3	122.59	383.209	167.512	96.9302	62.5814	285.093	98.3721	0.345053
1	3	17	133.76	60.8	34.21	20.02	28.28	106.78	311.07	141.395	79.5581	46.5581	248.326	65.7674	0.264844
1	3	18	163.05	71.06	34.71	31.06	59.94	119.36	379.186	165.256	80.7209	72.2326	277.581	139.395	0.502178
1	3	19	168.43	69.29	30.08	29.15	35.69	138.92	391.698	161.14	69.9535	67.7907	323.07	83	0.25691
1	3	20	156.58	51.48	40.82	25.46	47.42	124.31	364.14	119.721	94.9302	59.2093	289.093	110.279	0.381466
1	3	21	165.42	72.07	32.45	28.64	37.34	139.65	384.698	167.605	75.4651	66.6047	324.767	86.8372	0.267383
1	3	22	166.46	70.86	35.23	36	43.01	143.09	387.116	164.791	81.9302	83.7209	332.767	100.023	0.30058
1	3	23	147.63	66.65	34.66	26.42	45.28	121.08	343.326	155	80.6047	61.4419	281.581	105.302	0.373968
1	3	24	174.64	69.32	33.11	24.6	45.61	134.41	406.14	161.209	77	57.2093	312.581	106.07	0.339335
1	3	25	165.7	66.4	31.24	25.5	41.18	129.29	385.349	154.419	72.6512	59.3023	300.674	95.7674	0.318509
1	3	26	166.97	69.43	31.02	31.4	49.24	121.66	388.302	161.465	72.1395	73.0233	282.93	114.512	0.404735
1	3	27	158.07	64.78	38.42	23.71	35.74	129.36	367.605	150.651	89.3488	55.1395	300.837	83.1163	0.276283
1	3	28	170.66	69.72	42.3	39.32	51.01	131	396.884	162.14	98.3721	91.4419	304.651	118.628	0.389389
1	3	29	152.05	74.09	37.16	18.03	37.11	114.24	353.605	172.302	86.4186	41.9302	265.674	86.3023	0.324842
1	3	30	165.6	77.83	32.56	21.02	43.19	126.04	385.116	181	75.7209	48.8837	293.116	100.442	0.342669
1	3	31	153.31	71.03	33.24	15.26	36.14	106.74	356.535	165.186	77.3023	35.4884	248.233	84.0465	0.33858
1	3	32	164.21	62.43	46.01	24.6	39.81	117	381.884	145.186	107	57.2093	272.093	92.5814	0.340256
1	3	33	165.64	74.33	50	25.06	52.24	137.77	385.209	172.86	116.279	58.2791	320.395	121.488	0.379183
1	3	34	167.36	73.68	36.24	23.06	43.93	144.37	389.209	171.349	84.2791	53.6279	335.744	102.163	0.304288
1	3	35	128.97	70.72	30	18.25	28.64	104.18	299.93	164.465	69.7674	42.4419	242.279	66.6047	0.274909
1	3	36	171.29	69.03	38.64	31.06	36.35	149.97	398.349	160.535	89.8605	72.2326	348.767	84.5349	0.242382
1	3	37	162.69	73.82	28.64	25.06	34.48	146.33	378.349	171.674	66.6047	58.2791	340.302	80.186	0.235632
1	3	38	163.25	77.03	39.41	25.46	36.22	127.28	379.651	179.14	91.6512	59.2093	296	84.2326	0.284569
1	3	39	178.24	82.73	39.05	39.2	51.79	132.64	414.512	192.395	90.814	91.1628	308.465	120.442	0.390455
1	3	40	171.41	74.33	41.68	31.38	40.79	134.94	398.628	172.86	96.9302	72.9767	313.814	94.8605	0.302282
1	3	41	148.07	68.01	42.06	18.38	26.93	121.04	344.349	158.163	97.814	42.7442	281.488	62.6279	0.222488
1	3	42	156.49	70.72	32.56	31.91	36.62	125.9	363.93	164.465	75.7209	74.2093	292.791	85.1628	0.290866
1	3	43	173.9	70.61	37	32.76	40.5	139.09	404.419	164.209	86.0465	76.186	323.465	94.186	0.291178
1	3	44	155.71	67.36	32.2	28.32	35.78	128.8	362.116	156.651	74.8837	65.8605	299.535	83.2093	0.277795
1	3	45	167.19	64	41.01	32	38.83	130.97	388.814	148.837	95.3721	74.4186	304.581	90.3023	0.29648
1	3	46	158.52	69.2	45.4	24.17	40.61	129.81	368.651	160.93	105.581	56.2093	301.884	94.4419	0.312842
1	3	47	152.8	67.19	32.76	29.61	45.19	118.53	355.349	156.256	76.186	68.8605	275.651	105.093	0.381254
1	3	48	168.83	75.82	39.01	31.06	37.54	145.73	392.628	176.326	90.7209	72.2326	338.907	87.3023	0.2576
1	3	49	170.36	79.03	46.87	41.44	42.11	146.22	396.186	183.791	109	96.3721	340.047	97.9302	0.287991
1	3	50	158.24	73.38	36.62	28.18	36.06	134.37	368	170.651	85.1628	65.5349	312.488	83.8605	0.268363
2	1	1	175.14	70.66	30	27.17	129.45	57.25	407.302	164.326	69.7674	63.186	301.047	133.14	0.442256
2	1	2	168.18	74.3	32.56	25.32	136.56	40.52	391.116	172.791	75.7209	58.8837	317.581	94.2326	0.296719
2	1	3	167.8	61.62	30.02	25.55	108.93	47.71	390.233	143.302	69.814	59.4186	253.326	110.953	0.437988
2	1	4	171.75	71.59	38.29	29.7	137.87	46.1	399.419	166.488	89.0465	69.0698	320.628	107.209	0.334373
2	1	5	172.18	69.84	35.11	27.2	139.14	48.1	400.419	162.419	81.6512	63.2558	323.581	111.86	0.345695
2	1	6	173.22	77.47	35.23	27.23	135.16	45.35	402.837	180.163	81.9302	63.3256	314.326	105.465	0.335528
2	1	7	153.31	71.45	34.23	29.07	107.35	41.59	356.535	166.163	79.6047	67.6047	249.651	96.7209	0.387424
2	1	8	175.73	61.98	41.34	31.11	133.24	49.25	408.674	144.14	96.1395	72.3488	309.86	114.535	0.369634
2	1	9	173.73	73.82	28.02	19.65	140.35	50.25	404.023	171.674	65.1628	45.6977	326.395	116.86	0.358033
2	1	10	175.35	71.47	32.7	25.71	148.33	29.15	407.791	166.209	76.0465	59.7907	344.953	67.7907	0.196521
2	1	11	167.28	76.01	40.22	23.32	132.61	49.65	389.023	176.767	93.5349	54.2326	308.395	115.465	0.374406
2	1	12	146.66	73.06	26.17	19.21	113.09	41.44	341.07	169.907	60.8605	44.6744	263	96.3721	0.366434
2	1	13	174.05	82.3	38.83	22.67	133.45	50.48	404.767	191.395	90.3023	52.7209	310.349	117.395	0.378269
2	1	14	169.85	72.92	37.16	35.51	121.02	49.65	395	169.581	86.4186	82.5814	281.442	115.465	0.410263
2	1	15	183.14	69.35	30.07	30	129.53	48.55	425.907	161.279	69.9302	69.7674	301.233	112.907	0.374817
2	1	16	188.32	67.07	41.87	23.02	141.44	50	437.953	155.977	97.3721	53.5349	328.93	116.279	0.353507
2	1	17	159.03	77.01	28.32	18.44	121.49	36.14	369.837	179.093	65.8605	42.8837	282.535	84.0465	0.297473
2	1	18	165.17	66.29	36.36	26.93	128.72	50.16	384.116	154.163	84.5581	62.6279	299.349	116.651	0.389683
2	1	19	169.53	70.94	33.24	23.35	134.24	50.77	394.256	164.977	77.3023	54.3023	312.186	118.07	0.378203
2	1	20	182.8	68.1	42.64	31.06	122.59	51.66	425.116	158.372	99.1628	72.2326	285.093	120.14	0.421405
2	1	21	174.27	76.12	41.59	38.12	135.53	45.28	405.279	177.023	96.7209	88.6512	315.186	105.302	0.334096
2	1	22	161.3	78.85	30.59	24	141.35	34.99	375.116	183.372	71.1395	55.814	328.721	81.3721	0.247542
2	1	23	168.07	62.65	35.38	25.5	138.76	38.33	390.86	145.698	82.2791	59.3023	322.698	89.1395	0.276232
2	1	24	178.37	63.51	31.83	26.17	145.5	41.79	414.814	147.698	74.0233	60.8605	338.372	97.186	0.287216
2	1	25	164.07	71.45	37.44	30	136.33	37.85	381.558	166.163	87.0698	69.7674	317.047	88.0233	0.277635
2	1	26	175.6	70.01	31.78	27.29	148.06	40.16	408.372	162.814	73.907	63.4651	344.326	93.3953	0.271241
2	1	27	162.6	70.01	31.02	25.3	123.49	38.63	378.14	162.814	72.1395	58.8372	287.186	89.8372	0.312819
2	1	28	172.63	73.06	33.24	21.93	117.46	50.33	401.465	169.907	77.3023	51	273.163	117.047	0.428486
2	1	29	159.14	66.71	32.8	22.67	123.17	45.49	370.093	155.14	76.2791	52.7209	286.442	105.791	0.369327
2	1	30	163.03	76.84	40.02	26.57	119.1	39.22	379.14	178.698	93.0698	61.7907	276.977	91.2093	0.329303
2	1	31	149.93	73.82	30.41	25.61	128.7	38.28	348.674	171.674	70.7209	59.5581	299.302	89.0233	0.297436
2	1	32	154.26	73.78	31.62	26.17	124.39	42.15	358.744	171.581	73.5349	60.8605	289.279	98.0233	0.338854
2	1	33	170.06	73.38	30.23	17.89	127.53	43.46	395.488	170.651	70.3023	41.6047	296.581	101.07	0.340783
2	1	34	177.43	72.92	30.23	27.73	134.83	51.86	412.628	169.581	70.3023	64.4884	313.558	120.605	0.384633
2	1	35	167.09	61.19	26.17	16.49	123.04	46.32	388.581	142.302	60.8605	38.3488	286.14	107.721	0.376463
2	1	36	154.35	72.24	32.31	20.1	122.07	48.76	358.953	168	75.1395	46.7442	283.884	113.395	0.399443
2	1	37	163.98	69.07	35.61	23.43	136.65	40	381.349	160.628	82.814	54.4884	317.791	93.0233	0.292719
2	1	38	168.83	77.25	34.41	25.94	131.73	50.61	392.628	179.651	80.0233	60.3256	306.349	117.698	0.384195
2	1	39	172.24	71.57	35.47	22.2	137.06	44.28	400.558	166.442	82.4884	51.6279	318.744	102.977	0.32307
2	1	40	172.8	68.88	34.66	33.3	132.1	44.2	401.86	160.186	80.6047	77.4419	307.209	102.791	0.334595
2	1	41	160.08	75.11	30.87	29.68	126.92	45.28	372.279	174.674	71.7907	69.0233	295.163	105.302	0.35676
2	1	42	168.19	67.74	36.8	29.73	148.22	37.36	391.14	157.535	85.5814	69.1395	344.698	86.8837	0.252058
2	1	43	165.2	60.64	24.41	22.2	123.43	41.23	384.186	141.023	56.7674	51.6279	287.047	95.8837	0.334035
2	1	44	172.59	71.45	25	24.84	140.43	42.72	401.372	166.163	58.1395	57.7674	326.581	99.3488	0.304209
2	1	45	167.16	67.62	34.66	27.66	135.92	41.48	388.744	157.256	80.6047	64.3256	316.093	96.4651	0.30518
2	1	46	172.29	81.22	40.5	31.02	132.2	42.06	400.674	188.884	94.186	72.1395	307.442	97.814	0.318154
2	1	47	170.48	72.69	31.38	31.32	137.42	38.48	396.465	169.047	72.9767	72.8372	319.581	89.4884	0.280017
2	1	48	162.83	65.22	35.74	20.62	121.66	48.6	378.674	151.674	83.1163	47.9535	282.93	113.023	0.399474
2	1	49	151.33	73.66	29.83	23.43	119.2	37.44	351.93	171.302	69.3721	54.4884	277.209	87.0698	0.314094
2	1	50	166.71	68.88	41.11	35.36	134.3	50.09	387.698	160.186	95.6047	82.2326	312.326	116.488	0.372971
2	2	1	160.73	70.52	33.62	19.31	126.19	38.01	373.791	164	78.186	44.907	293.465	88.3953	0.301212
2	2	2	172.47	72.18	38.63	25.06	132.97	45.28	401.093	167.86	89.8372	58.2791	309.233	105.302	0.340528
2	2	3	158.32	76.12	38.6	33.97	129.25	40.05	368.186	177.023	89.7674	79	300.581	93.1395	0.309865
2	2	4	147.14	74	34.18	21.93	113.99	30.02	342.186	172.093	79.4884	51	265.093	69.814	0.263356
2	2	5	161.82	72.35	35.69	23.54	127.48	37.7	376.326	168.256	83	54.7442	296.465	87.6744	0.295733
2	2	6	171.01	72.67	37.8	31.91	134.74	47.17	397.698	169	87.907	74.2093	313.349	109.698	0.350082
2	2	7	162.79	75.21	41.01	25.02	123.69	42.72	378.581	174.907	95.3721	58.186	287.651	99.3488	0.34538
2	2	8	159.45	67.6	30.53	17.03	129.12	38.08	370.814	157.209	71	39.6047	300.279	88.5581	0.294919
2	2	9	166.37	72.2	43.29	32	131.32	44.38	386.907	167.907	100.674	74.4186	305.395	103.209	0.337953
2	2	10	157.08	70.01	34.41	24.21	127.03	26.04	365.302	162.814	80.0233	56.3023	295.419	60.5581	0.204991
2	2	11	170.43	70.71	32.02	28.16	130.6	41.76	396.349	164.442	74.4651	65.4884	303.721	97.1163	0.319755
2	2	12	157.29	71.06	33.12	23.85	131.06	37.22	365.791	165.256	77.0233	55.4651	304.791	86.5581	0.283992
2	2	13	150.44	71.57	36.62	29.53	135.52	33.54	349.86	166.442	85.1628	68.6744	315.163	78	0.247491
2	2	14	172.41	69.03	34.93	23.77	131.48	47.93	400.953	160.535	81.2326	55.2791	305.767	111.465	0.364542
2	2	15	163.98	72.45	28.84	22.36	132.97	37.22	381.349	168.488	67.0698	52	309.233	86.5581	0.279913
2	2	16	162.8	70.09	26.83	22.36	128.97	37.54	378.605	163	62.3953	52	299.93	87.3023	0.291075
2	2	17	124.33	70.84	21.26	18.38	98.02	29.15	289.14	164.744	49.4419	42.7442	227.953	67.7907	0.297388
2	2	18	159.71	76.69	27.29	20.22	118.23	36.24	371.419	178.349	63.4651	47.0233	274.953	84.2791	0.306521
2	2	19	146.01	69.29	27.29	20.59	111.13	32.28	339.558	161.14	63.4651	47.8837	258.442	75.0698	0.290471
2	2	20	166	76.42	35.38	27.66	131.03	37.85	386.047	177.721	82.2791	64.3256	304.721	88.0233	0.288865
2	2	21	145.69	72.18	26.25	20.62	110.02	31.38	338.814	167.86	61.0465	47.9535	255.86	72.9767	0.285221
2	2	22	168.76	77.23	34.71	19.42	142.27	38.21	392.465	179.605	80.7209	45.1628	330.86	88.8605	0.268574
2	2	23	171.41	65.46	35.23	31.04	131.56	40	398.628	152.233	81.9302	72.186	305.953	93.0233	0.304044
2	2	24	143.41	65.66	25.61	19.21	121.8	21.54	333.512	152.698	59.5581	44.6744	283.256	50.093	0.176847
2	2	25	163	70.35	29.15	19.85	128.72	42.43	379.07	163.605	67.7907	46.1628	299.349	98.6744	0.32963
2	2	26	160.15	75.06	29.83	26.91	132.97	36.4	372.442	174.558	69.3721	62.5814	309.233	84.6512	0.273746
2	2	27	175.65	70.16	23.32	21.02	140.39	41.23	408.488	163.163	54.2326	48.8837	326.488	95.8837	0.293682
2	2	28	161.04	72.8	33.96	25.08	130.39	33.62	374.512	169.302	78.9767	58.3256	303.233	78.186	0.257842
2	2	29	151.49	75.6	30.02	28.02	120.6	30	352.302	175.814	69.814	65.1628	280.465	69.7674	0.248756
2	2	30	141.76	72.56	24.41	20.59	133.73	39.66	329.674	168.744	56.7674	47.8837	311	92.2326	0.296568
2	2	31	156.92	72.56	24.41	20.59	133.73	39.66	364.93	168.744	56.7674	47.8837	311	92.2326	0.296568
2	2	32	161.01	82.29	35.23	27.89	142.3	34.89	374.442	191.372	81.9302	64.8605	330.93	81.1395	0.245186
2	2	33	148.38	72.12	32.57	22.14	118.27	39.29	345.07	167.721	75.7442	51.4884	275.047	91.3721	0.332206
2	2	34	173.62	75.58	35.36	31.62	142	47.01	403.767	175.767	82.2326	73.5349	330.233	109.326	0.331056
2	2	35	171.83	69.35	36.12	22.02	142.76	40.17	399.605	161.279	84	51.2093	332	93.4186	0.281381
2	2	36	159.96	74.33	39.22	28.16	134.53	39.82	372	172.86	91.2093	65.4884	312.86	92.6047	0.295993
2	2	37	172.56	66.6	34.01	27.17	139.46	46.86	401.302	154.884	79.093	63.186	324.326	108.977	0.33601
2	2	38	166.58	72.4	32.56	24.02	120.62	48.27	387.395	168.372	75.7209	55.8605	280.512	112.256	0.400182
2	2	39	156.72	73.43	37.22	25.55	127.78	31.62	364.465	170.767	86.5581	59.4186	297.163	73.5349	0.247457
2	2	40	156.67	75.66	34.21	23.09	127.99	21.63	364.349	175.953	79.5581	53.6977	297.651	50.3023	0.168998
2	2	41	154.3	79.65	42.56	26.57	125.6	29.07	358.837	185.233	98.9767	61.7907	292.093	67.6047	0.231449
2	2	42	149.03	72.11	27.86	17.72	105.95	30.59	346.581	167.698	64.7907	41.2093	246.395	71.1395	0.288721
2	2	43	158.86	73.68	38.08	24.19	131.75	22.47	369.442	171.349	88.5581	56.2558	306.395	52.2558	0.17055
2	2	44	176.87	71.42	39	32.02	135.91	49.24	411.326	166.093	90.6977	74.4651	316.07	114.512	0.362299
2	2	45	166.07	71.45	32.25	20	129.83	44.05	386.209	166.163	75	46.5116	301.93	102.442	0.33929
2	2	46	174.73	73.41	37.48	24.21	136.46	50.8	406.349	170.721	87.1628	56.3023	317.349	118.14	0.37227
2	2	47	174.23	77.9	39.7	29.83	129.71	48.88	405.186	181.163	92.3256	69.3721	301.651	113.674	0.376841
2	2	48	153	71.61	27.78	14.32	124.62	38.42	355.814	166.535	64.6047	33.3023	289.814	89.3488	0.308297
2	2	49	180.65	78.82	35.85	25.3	140.26	46.1	420.116	183.302	83.3721	58.8372	326.186	107.209	0.328675
2	2	50	174.75	78.75	35.74	20.88	143.39	44.65	406.395	183.14	83.1163	48.5581	333.465	103.837	0.311389
2	3	1	151.17	74.97	40.52	39	130	29.68	351.558	174.349	94.2326	90.6977	302.326	69.0233	0.228308
2	3	2	171.13	73.11	38.08	23.41	122.87	40.5	397.977	170.023	88.5581	54.4419	285.744	94.186	0.329617
2	3	3	173.59	69.78	38.6	27.07	127.95	43.83	403.698	162.279	89.7674	62.9535	297.558	101.93	0.342556
2	3	4	153.08	65.73	33.97	29	121.8	41.88	356	152.86	79	67.4419	283.256	97.3953	0.343842
2	3	5	165.95	65.3	31.62	24.7	138.6	35	385.93	151.86	73.5349	57.4419	322.326	81.3953	0.252525
2	3	6	157.55	70.18	33.11	30.02	122.77	48.1	366.395	163.209	77	69.814	285.512	111.86	0.39179
2	3	7	183.34	67.54	37	27.02	134.77	41	426.372	157.07	86.0465	62.8372	313.419	95.3488	0.304222
2	3	8	149.91	64.29	36.89	25.3	127.81	33.84	348.628	149.512	85.7907	58.8372	297.233	78.6977	0.264768
2	3	9	176.24	76.79	45.88	37.22	133	47.04	409.86	178.581	106.698	86.5581	309.302	109.395	0.353684
2	3	10	148.93	75.17	36.01	22.2	114.84	31.78	346.349	174.814	83.7442	51.6279	267.07	73.907	0.276733
2	3	11	151.85	73.33	29.27	21.1	116.18	36.06	353.14	170.535	68.0698	49.0698	270.186	83.8605	0.31038
2	3	12	175.38	80.11	31.4	23.77	127	41.4	407.86	186.302	73.0233	55.2791	295.349	96.2791	0.325984
2	3	13	157.84	62.2	36.12	25.96	137.23	31.78	367.07	144.651	84	60.3721	319.14	73.907	0.231582
2	3	14	176.78	70.33	35.78	27.66	138.29	46.53	411.116	163.558	83.2093	64.3256	321.605	108.209	0.336467
2	3	15	176.41	69.18	34.66	23.32	136.12	48.27	410.256	160.884	80.6047	54.2326	316.558	112.256	0.354614
2	3	16	181.76	74.41	41.62	31.91	139.79	35.23	422.698	173.047	96.7907	74.2093	325.093	81.9302	0.252021
2	3	17	157.89	73.76	31.32	29.83	132.77	38.08	367.186	171.535	72.8372	69.3721	308.767	88.5581	0.286812
2	3	18	164.68	72.45	44.6	29.83	131.7	43.42	382.977	168.488	103.721	69.3721	306.279	100.977	0.329689
2	3	19	172.15	69.81	36.06	23.35	120.37	42.19	400.349	162.349	83.8605	54.3023	279.93	98.1163	0.350503
2	3	20	168.88	68.1	41.11	29.27	121.24	44.27	392.744	158.372	95.6047	68.0698	281.953	102.953	0.365144
2	3	21	164.3	71.2	36.06	27	141.77	34.83	382.093	165.581	83.8605	62.7907	329.698	81	0.24568
2	3	22	129.71	75.29	30.68	21.19	100.44	36.4	301.651	175.093	71.3488	49.2791	233.581	84.6512	0.362405
2	3	23	170	70.71	38.28	33.11	120.54	49.37	395.349	164.442	89.0233	77	280.326	114.814	0.409574
2	3	24	162.74	76.16	33.24	29.07	134.16	38.48	378.465	177.116	77.3023	67.6047	312	89.4884	0.286822
2	3	25	156.59	71.18	30	29.83	116.18	33.94	364.163	165.535	69.7674	69.3721	270.186	78.9302	0.292133
2	3	26	171.49	69.87	37.01	25.24	129.08	39.92	398.814	162.488	86.0698	58.6977	300.186	92.8372	0.309266
2	3	27	174.54	73.82	37.64	24.08	128.08	46.49	405.907	171.674	87.5349	56	297.86	108.116	0.362976
2	3	28	170.02	69.57	27.66	22.02	135.99	39.66	395.395	161.791	64.3256	51.2093	316.256	92.2326	0.291639
2	3	29	147.34	71.69	26.25	19.1	125.72	35.85	342.651	166.721	61.0465	44.4186	292.372	83.3721	0.285157
2	3	30	150.12	70.26	30.08	21	110.55	30.27	349.116	163.395	69.9535	48.8372	257.093	70.3953	0.273813
2	3	31	171.03	75.47	37.12	25.55	108.47	51.87	397.744	175.512	86.3256	59.4186	252.256	120.628	0.478197
2	3	32	129.63	65.46	19.31	15.3	91.76	23.41	301.465	152.233	44.907	35.5814	213.395	54.4419	0.255122
2	3	33	170.58	65.8	31.06	25.55	124.48	41.04	396.698	153.023	72.2326	59.4186	289.488	95.4419	0.329692
2	3	34	178.51	69.07	32.57	23.77	122.02	47.01	415.14	160.628	75.7442	55.2791	283.767	109.326	0.385265
2	3	35	161.31	73.38	34.67	26.42	137.13	45.18	375.14	170.651	80.6279	61.4419	318.907	105.07	0.329468
2	3	36	160.61	70.03	38.28	24.41	122.59	46.27	373.512	162.86	89.0233	56.7674	285.093	107.605	0.377437
2	3	37	180.35	71.25	38.63	28.79	144.01	38.12	419.419	165.698	89.8372	66.9535	334.907	88.6512	0.264704
2	3	38	166.59	77.78	33.42	26.91	131.64	44.72	387.419	180.884	77.7209	62.5814	306.14	104	0.339714
2	3	39	165.92	65	31.05	25.5	118.3	43.42	385.86	151.163	72.2093	59.3023	275.116	100.977	0.367033
2	3	40	161.99	75.29	31.24	22.8	130.17	32.57	376.721	175.093	72.6512	53.0233	302.721	75.7442	0.250211
2	3	41	166.6	76.3	37.48	28.16	124.04	46.1	387.442	177.442	87.1628	65.4884	288.465	107.209	0.371654
2	3	42	169.53	67.12	29.43	23.09	112.93	46.39	394.256	156.093	68.4419	53.6977	262.628	107.884	0.410785
2	3	43	173.01	75.13	35.38	25.46	135.62	43.19	402.349	174.721	82.2791	59.2093	315.395	100.442	0.318463
2	3	44	158.47	72.4	29.07	25.55	127.81	37.34	368.535	168.372	67.6047	59.4186	297.233	86.8372	0.292152
2	3	45	175.84	68.94	38.08	26.25	116.97	60.53	408.93	160.326	88.5581	61.0465	272.023	140.767	0.517483
2	3	46	163.64	66.71	29.07	23.85	119.52	44.69	380.558	155.14	67.6047	55.4651	277.953	103.93	0.373912
2	3	47	164.75	69.38	37.7	23.32	117.15	39.12	383.14	161.349	87.6744	54.2326	272.442	90.9767	0.333931
2	3	48	162.43	71.34	26.02	20.1	136.03	37.2	377.744	165.907	60.5116	46.7442	316.349	86.5116	0.273469
2	3	49	132.38	75.29	24.35	23.77	111	25	307.86	175.093	56.6279	55.2791	258.14	58.1395	0.225225
2	3	50	147.57	75.29	27.07	23.02	119.97	30.68	343.186	175.093	62.9535	53.5349	279	71.3488	0.255731
3	1	1	168.34	77.47	36.67	32.39	110.8	63.41	391.488	180.163	85.2791	75.3256	257.674	147.465	0.572292
3	1	2	176.41	74.33	26.02	24	120.03	56.52	410.256	172.86	60.5116	55.814	279.14	131.442	0.470882
3	1	3	167.01	78.16	41.05	32.7	131.4	41.77	388.395	181.767	95.4651	76.0465	305.581	97.1395	0.317884
3	1	4	165.74	76.16	27.8	19.8	123.33	42.11	385.442	177.116	64.6512	46.0465	286.814	97.9302	0.341442
3	1	5	178.13	75.24	41.87	36.36	134.24	51.24	414.256	174.977	97.3721	84.5581	312.186	119.163	0.381704
3	1	6	157.99	76.03	38.48	21.02	110.39	50.29	367.419	176.814	89.4884	48.8837	256.721	116.953	0.455567
3	1	7	163.36	65.95	32.28	21.59	123.17	35.51	379.907	153.372	75.0698	50.2093	286.442	82.5814	0.288301
3	1	8	158.65	81.84	40.79	30.15	128	32.8	368.953	190.326	94.8605	70.1163	297.674	76.2791	0.25625
3	1	9	158.4	83.55	33.96	21.38	120.43	42.72	368.372	194.302	78.9767	49.7209	280.07	99.3488	0.354729
3	1	10	168.58	83.01	32.53	21.26	117.89	47.1	392.047	193.047	75.6512	49.4419	274.163	109.535	0.399525
3	1	11	177.13	74.69	36.24	33.29	134.63	39.81	411.93	173.698	84.2791	77.4186	313.093	92.5814	0.295699
3	1	12	180.09	69.46	35.23	29.15	145.17	45.45	418.814	161.535	81.9302	67.7907	337.605	105.698	0.313081
3	1	13	177.59	75.29	29.55	26	131.61	50.48	413	175.093	68.7209	60.4651	306.07	117.395	0.383557
3	1	14	175.87	76.16	37.2	26.4	127.49	46.84	409	177.116	86.5116	61.3953	296.488	108.93	0.367401
3	1	15	173	69.07	37.36	22.56	136.42	29.97	402.326	160.628	86.8837	52.4651	317.256	69.6977	0.219689
3	1	16	174.9	73.59	41.77	19.03	135.15	40.82	406.744	171.14	97.1395	44.2558	314.302	94.9302	0.302035
3	1	17	162.41	79.03	37.64	33.84	141.6	36.8	377.698	183.791	87.5349	78.6977	329.302	85.5814	0.259887
3	1	18	164.92	82.57	28.16	24	135.13	48.26	383.535	192.023	65.4884	55.814	314.256	112.233	0.357138
3	1	19	183.96	84.91	39.2	26.08	140.21	49.65	427.814	197.465	91.1628	60.6512	326.07	115.465	0.354112
3	1	20	185.35	80.52	36.72	31.95	149.75	38.47	431.047	187.256	85.3953	74.3023	348.256	89.4651	0.256895
3	1	21	174.45	64.85	36.01	26.08	140.47	53.23	405.698	150.814	83.7442	60.6512	326.674	123.791	0.378942
3	1	22	175.19	83.43	43.57	30.27	132.03	52.48	407.419	194.023	101.326	70.3953	307.047	122.047	0.397485
3	1	23	173.68	82.38	38.33	31.58	134.62	43.42	403.907	191.581	89.1395	73.4419	313.07	100.977	0.322538
3	1	24	180.48	76.37	38.12	23.35	144.4	45.61	419.721	177.605	88.6512	54.3023	335.814	106.07	0.315859
3	1	25	169.85	75.66	40.85	32.7	139.09	43.93	395	175.953	95	76.0465	323.465	102.163	0.315839
3	1	26	176.41	81.15	42.95	28.65	140.39	51.88	410.256	188.721	99.8837	66.6279	326.488	120.651	0.369542
3	1	27	176.37	72.8	36.72	23.85	118.11	54.23	410.163	169.302	85.3953	55.4651	274.674	126.116	0.459148
3	1	28	165.87	75.43	27.07	29.07	130.63	35.11	385.744	175.419	62.9535	67.6047	303.791	81.6512	0.268774
3	1	29	185	76.48	41.01	32.06	140.12	41.87	430.233	177.86	95.3721	74.5581	325.86	97.3721	0.298815
3	1	30	153.44	72.99	31.24	22.67	119.71	33.62	356.837	169.744	72.6512	52.7209	278.395	78.186	0.280845
3	1	31	166.88	70.94	35.47	26.08	137.35	43.42	388.093	164.977	82.4884	60.6512	319.419	100.977	0.316127
3	1	32	181.43	80.99	39.01	33	143.96	46.52	421.93	188.349	90.7209	76.7442	334.791	108.186	0.323145
3	1	33	173.85	82.76	39.12	23.32	134.85	43.42	404.302	192.465	90.9767	54.2326	313.605	100.977	0.321987
3	1	34	165.3	81.27	30.59	26.25	140.72	36.12	384.419	189	71.1395	61.0465	327.256	84	0.25668
3	1	35	146.82	66.94	34.44	21.63	119.04	22.2	341.442	155.674	80.093	50.3023	276.837	51.6279	0.186492
3	1	36	157.7	83.22	38.63	22.8	123.86	51.08	366.744	193.535	89.8372	53.0233	288.047	118.791	0.412401
3	1	37	161.38	83.22	43.01	24.41	140.17	38.12	375.302	193.535	100.023	56.7674	325.977	88.6512	0.271955
3	1	38	160.61	76.94	38.12	24	113.84	43.32	373.512	178.93	88.6512	55.814	264.744	100.744	0.380534
3	1	39	177.89	88.14	47.12	31.95	123.48	48.3	413.698	204.977	109.581	74.3023	287.163	112.326	0.391156
3	1	40	159.78	84.79	33.53	26.48	110.11	48.8	371.581	197.186	77.9767	61.5814	256.07	113.488	0.443193
3	1	41	157.11	77.32	25.08	23.09	125.17	37.85	365.372	179.814	58.3256	53.6977	291.093	88.0233	0.302389
3	1	42	161.01	70.26	27	23.02	129.84	39.05	374.442	163.395	62.7907	53.5349	301.953	90.814	0.300755
3	1	43	153.68	87.37	28.86	26.4	124.45	33.97	357.395	203.186	67.1163	61.3953	289.419	79	0.272961
3	1	44	174.66	75.13	53.15	38.01	136.07	42.19	406.186	174.721	123.605	88.3953	316.442	98.1163	0.310061
3	1	45	162.05	75.43	35.23	26.08	107.91	51.22	376.86	175.419	81.9302	60.6512	250.953	119.116	0.474655
3	1	46	168.01	75.01	32.56	22.2	115.57	46.87	390.721	174.442	75.7209	51.6279	268.767	109	0.405555
3	1	47	173.14	81.3	35.47	32.2	137.62	39.12	402.651	189.07	82.4884	74.8837	320.047	90.9767	0.284261
3	1	48	162.6	69.18	35.18	26.17	130.75	41.11	378.14	160.884	81.814	60.8605	304.07	95.6047	0.314417
3	1	49	168.36	73.41	34.06	25.18	126.57	53.67	391.535	170.721	79.2093	58.5581	294.349	124.814	0.424034
3	1	50	174.89	75.93	36.89	28.02	138.25	49.48	406.721	176.581	85.7907	65.1628	321.512	115.07	0.357902
3	2	1	168.81	80.78	31.91	26.4	132.42	40.72	392.581	187.86	74.2093	61.3953	307.953	94.6977	0.307506
3	2	2	179.74	75.29	36.35	25.5	139.28	50.22	418	175.093	84.5349	59.3023	323.907	116.791	0.360569
3	2	3	164.88	58.73	27.2	22.2	123.81	47.2	383.442	136.581	63.2558	51.6279	287.93	109.767	0.381229
3	2	4	166.57	83.17	35.34	24.04	126.29	44.28	387.372	193.419	82.186	55.907	293.698	102.977	0.350622
3	2	5	169.8	73	34.89	25.08	135.21	42.01	394.884	169.767	81.1395	58.3256	314.442	97.6977	0.310702
3	2	6	167.63	74.46	31.32	24.35	119.54	46.14	389.837	173.163	72.8372	56.6279	278	107.302	0.38598
3	2	7	153.57	73.08	36.14	28.64	102.04	46.01	357.14	169.953	84.0465	66.6047	237.302	107	0.450902
3	2	8	178.81	73.93	38.01	22.56	134.35	51.74	415.837	171.93	88.3953	52.4651	312.442	120.326	0.385114
3	2	9	158.42	77.01	31.91	17.49	120.54	33.96	368.419	179.093	74.2093	40.6744	280.326	78.9767	0.281732
3	2	10	179.48	74.63	35.36	22.02	146.17	47.04	417.395	173.558	82.2326	51.2093	339.93	109.395	0.321817
3	2	11	164.26	70.71	36.12	28	131.93	42.95	382	164.442	84	65.1163	306.814	99.8837	0.325551
3	2	12	186.69	75.5	44.78	34.54	149.89	53.6	434.163	175.581	104.14	80.3256	348.581	124.651	0.357596
3	2	13	163.32	77.88	42.54	28.3	121.06	63.39	379.814	181.116	98.9302	65.814	281.535	147.419	0.523625
3	2	14	180.6	67.42	38.21	23.02	135.77	45.28	420	156.791	88.8605	53.5349	315.744	105.302	0.333505
3	2	15	177.63	69.64	34	26.63	141.15	47.8	413.093	161.953	79.0698	61.9302	328.256	111.163	0.338647
3	2	16	164.98	66.1	33.24	26.31	110.02	55.01	383.674	153.721	77.3023	61.186	255.86	127.93	0.5
3	2	17	164.05	65.12	33.24	23.6	131.03	43.74	381.512	151.442	77.3023	54.8837	304.721	101.721	0.333817
3	2	18	177.34	77.49	31.76	26.4	133.09	49.09	412.419	180.209	73.8605	61.3953	309.512	114.163	0.368848
3	2	19	172.05	73.06	34.06	26.93	144.75	31.24	400.116	169.907	79.2093	62.6279	336.628	72.6512	0.21582
3	2	20	172.41	68.96	35.38	27.8	133.96	50.33	400.953	160.372	82.2791	64.6512	311.535	117.047	0.375709
3	2	21	171.49	71.28	35.36	22.36	141.82	42.52	398.814	165.767	82.2326	52	329.814	98.8837	0.299817
3	2	22	181.46	69.86	34.99	26.83	133.3	53	422	162.465	81.3721	62.3953	310	123.256	0.397599
3	2	23	187.21	73.35	37.12	15.3	157.08	29.12	435.372	170.581	86.3256	35.5814	365.302	67.7209	0.185383
3	2	24	175.7	66.37	33.84	27.78	131.05	54.12	408.605	154.349	78.6977	64.6047	304.767	125.86	0.412972
3	2	25	171.62	79.76	38.84	28.64	138.51	44.64	399.116	185.488	90.3256	66.6047	322.116	103.814	0.322287
3	2	26	176.3	84.6	36.4	21.95	129.45	46.4	410	196.744	84.6512	51.0465	301.047	107.907	0.35844
3	2	27	174.39	76.12	41.78	29.83	131.61	47.54	405.558	177.023	97.1628	69.3721	306.07	110.558	0.361219
3	2	28	154.85	83.41	37.64	28.64	107.45	42.52	360.116	193.977	87.5349	66.6047	249.884	98.8837	0.395719
3	2	29	164.25	73.01	33.12	23.6	132.85	44.1	381.977	169.791	77.0233	54.8837	308.953	102.558	0.331953
3	2	30	164.15	72.92	37.95	30.59	113.6	43.57	381.744	169.581	88.2558	71.1395	264.186	101.326	0.383539
3	2	31	172.9	72.18	36.88	28.32	143.13	36.62	402.093	167.86	85.7674	65.8605	332.86	85.1628	0.255851
3	2	32	143.28	68.07	30.89	19.24	114.98	25.5	333.209	158.302	71.8372	44.7442	267.395	59.3023	0.221778
3	2	33	174.29	74.09	34.71	27.51	130.63	45.65	405.326	172.302	80.7209	63.9767	303.791	106.163	0.34946
3	2	34	176.41	73.55	31.24	18.79	129.34	59.48	410.256	171.047	72.6512	43.6977	300.791	138.326	0.459873
3	2	35	163.67	76.84	34.06	23.35	129.32	44.05	380.628	178.698	79.2093	54.3023	300.744	102.442	0.340628
3	2	36	177.79	78.1	32.28	31.38	126.06	54.15	413.465	181.628	75.0698	72.9767	293.163	125.93	0.429557
3	2	37	160.33	74.95	35.23	23.35	119.1	48.17	372.86	174.302	81.9302	54.3023	276.977	112.023	0.40445
3	2	38	179.75	80.08	39.41	25.24	140.73	50.29	418.023	186.233	91.6512	58.6977	327.279	116.953	0.357351
3	2	39	179.23	80.14	35.51	30.41	136.01	46.17	416.814	186.372	82.5814	70.7209	316.302	107.372	0.33946
3	2	40	162.83	74.03	40.46	32.2	134.42	45.45	378.674	172.163	94.093	74.8837	312.605	105.698	0.338119
3	2	41	167.76	69.72	34.41	25.06	126.06	51.97	390.14	162.14	80.0233	58.2791	293.163	120.86	0.412264
3	2	42	164.5	76.55	46.1	32.2	133	41.87	382.558	178.023	107.209	74.8837	309.302	97.3721	0.314812
3	2	43	167.8	76.01	43.83	29.15	134.36	37.64	390.233	176.767	101.93	67.7907	312.465	87.5349	0.280143
3	2	44	160.01	74.06	31.02	25.02	131	45.1	372.116	172.233	72.1395	58.186	304.651	104.884	0.344275
3	2	45	187.77	86.83	39.36	31.3	128.81	58.31	436.674	201.93	91.5349	72.7907	299.558	135.605	0.452682
3	2	46	170.99	73.79	37.95	29.12	134.62	40.36	397.651	171.605	88.2558	67.7209	313.07	93.8605	0.299807
3	2	47	163.29	81.54	37.16	29.97	127.39	44.41	379.744	189.628	86.4186	69.6977	296.256	103.279	0.348614
3	2	48	173.57	81.15	38.28	26.25	141.04	49.77	403.651	188.721	89.0233	61.0465	328	115.744	0.352879
3	2	49	170.95	78.64	36.14	32.56	136.12	46.24	397.558	182.884	84.0465	75.7209	316.558	107.535	0.3397
3	2	50	168.36	72.25	41.04	29.07	135.28	45.8	391.535	168.023	95.4419	67.6047	314.605	106.512	0.338557
3	3	1	175.57	95.52	36.01	30.15	133.09	42.44	408.302	222.14	83.7442	70.1163	309.512	98.6977	0.318882
3	3	2	160.72	58.52	42.43	30.46	112.31	48.09	373.767	136.093	98.6744	70.8372	261.186	111.837	0.42819
3	3	3	166.82	80.16	33.97	28.65	127.39	51.24	387.953	186.419	79	66.6279	296.256	119.163	0.402229
3	3	4	161.47	72.11	31.78	26.31	134.37	38.9	375.512	167.698	73.907	61.186	312.488	90.4651	0.289499
3	3	5	164.03	68.03	24.33	21	145	23.35	381.465	158.209	56.5814	48.8372	337.209	54.3023	0.161034
3	3	6	165.74	68.66	36.69	33.24	126.1	48.01	385.442	159.674	85.3256	77.3023	293.256	111.651	0.38073
3	3	7	171.7	69.81	33.24	24.76	141.5	45.97	399.302	162.349	77.3023	57.5814	329.07	106.907	0.324876
3	3	8	127.58	63.41	30.27	21	113.22	23.41	296.698	147.465	70.3953	48.8372	263.302	54.4419	0.206766
3	3	9	181	73.17	35.38	29.7	144.68	42.3	420.93	170.163	82.2791	69.0698	336.465	98.3721	0.292369
3	3	10	173.46	78.77	30.02	25.5	137.62	43.86	403.395	183.186	69.814	59.3023	320.047	102	0.318704
3	3	11	162.69	76.32	35.81	27.59	127.01	45.18	378.349	177.488	83.2791	64.1628	295.372	105.07	0.35572
3	3	12	175.51	81.06	46.14	36.77	132.46	49.16	408.163	188.512	107.302	85.5116	308.047	114.326	0.371131
3	3	13	173.57	72.01	41.18	31.38	143.18	37.66	403.651	167.465	95.7674	72.9767	332.977	87.5814	0.263026
3	3	14	161.9	71.56	32.39	25.32	134.18	42.45	376.512	166.419	75.3256	58.8837	312.047	98.7209	0.316366
3	3	15	164.92	81.02	39.12	34.06	111.83	43.6	383.535	188.419	90.9767	79.2093	260.07	101.395	0.389877
3	3	16	169.37	78.55	35.22	31.4	146.71	33.11	393.884	182.674	81.907	73.0233	341.186	77	0.225683
3	3	17	182.54	68.54	39.2	34.48	142.89	50.61	424.512	159.395	91.1628	80.186	332.302	117.698	0.354189
3	3	18	171.82	75.72	33.53	30.68	134.83	33.96	399.581	176.093	77.9767	71.3488	313.558	78.9767	0.251873
3	3	19	178.6	66.37	37.54	24.21	129.63	51.4	415.349	154.349	87.3023	56.3023	301.465	119.535	0.396513
3	3	20	187.28	75.39	34.53	33.73	152.64	52.35	435.535	175.326	80.3023	78.4419	354.977	121.744	0.342964
3	3	21	176.88	76.85	33.53	31.95	152.23	43.28	411.349	178.721	77.9767	74.3023	354.023	100.651	0.284307
3	3	22	189.43	75.24	35.23	31.78	156.25	47.51	440.535	174.977	81.9302	73.907	363.372	110.488	0.304064
3	3	23	166.48	73.24	40.05	32.25	135.15	53.71	387.163	170.326	93.1395	75	314.302	124.907	0.39741
3	3	24	168.81	74.24	35.51	32.65	136.62	33.24	392.581	172.651	82.5814	75.9302	317.721	77.3023	0.243303
3	3	25	173.48	82.1	33.6	24.84	129.71	52.33	403.442	190.93	78.1395	57.7674	301.651	121.698	0.403438
3	3	26	184.26	73.41	37.36	31.05	145.17	44.38	428.512	170.721	86.8837	72.2093	337.605	103.209	0.305711
3	3	27	174.49	71.34	30.27	22.56	112.36	36.69	405.791	165.907	70.3953	52.4651	261.302	85.3256	0.32654
3	3	28	180.56	75.29	41.3	33.38	139.2	53.15	419.907	175.093	96.0465	77.6279	323.721	123.605	0.381825
3	3	29	174.98	77.1	34.48	30.41	127.8	55.44	406.93	179.302	80.186	70.7209	297.209	128.93	0.433803
3	3	30	165.44	72.84	33.02	30.48	117.43	50.25	384.744	169.395	76.7907	70.8837	273.093	116.86	0.427915
3	3	31	178.76	82.15	43.19	33.02	133.66	56.44	415.721	191.047	100.442	76.7907	310.837	131.256	0.422265
3	3	32	171.68	69.4	36.62	27.78	116.1	57.31	399.256	161.395	85.1628	64.6047	270	133.279	0.493626
3	3	33	152.09	73.74	29.83	27.59	123.17	34.13	353.698	171.488	69.3721	64.1628	286.442	79.3721	0.277097
3	3	34	171.81	80.23	36.4	32.57	132.06	47.01	399.558	186.581	84.6512	75.7442	307.116	109.326	0.355975
3	3	35	172.26	74.97	36.8	24.04	136.46	54.38	400.605	174.349	85.5814	55.907	317.349	126.465	0.398505
3	3	36	180.27	76.49	33.84	25.3	140.25	48.84	419.233	177.884	78.6977	58.8372	326.163	113.581	0.348235
3	3	37	168.44	75.6	37.12	24.19	130.86	48.27	391.721	175.814	86.3256	56.2558	304.326	112.256	0.368867
3	3	38	162.05	67.23	39	30.89	135.91	39.6	376.86	156.349	90.6977	71.8372	316.07	92.093	0.291369
3	3	39	177	68.03	36.4	33.6	134.95	51.42	411.628	158.209	84.6512	78.1395	313.837	119.581	0.38103
3	3	40	185.61	84.05	40.22	36.24	152.78	45.4	431.651	195.465	93.5349	84.2791	355.302	105.581	0.297159
3	3	41	177.26	77.79	33.53	29.83	127.46	44.1	412.233	180.907	77.9767	69.3721	296.419	102.558	0.345991
3	3	42	188.05	85.42	38.21	30.27	139.32	52.35	437.326	198.651	88.8605	70.3953	324	121.744	0.375754
3	3	43	161.2	74.01	24.17	19.7	120.33	39.29	374.884	172.116	56.2093	45.814	279.837	91.3721	0.326519
3	3	44	166.63	77.47	38.08	31.38	102.12	55.32	387.512	180.163	88.5581	72.9767	237.488	128.651	0.541716
3	3	45	158.9	67.78	32.56	20.88	140.43	31.05	369.535	157.628	75.7209	48.5581	326.581	72.2093	0.221107
3	3	46	161.82	65.46	38.28	28.64	129.87	50.49	376.326	152.233	89.0233	66.6047	302.023	117.419	0.388773
3	3	47	156.98	68.8	36.62	25.08	132.7	38.28	365.07	160	85.1628	58.3256	308.605	89.0233	0.28847
3	3	48	184.11	77.62	40.05	27.66	140.25	47.54	428.163	180.512	93.1395	64.3256	326.163	110.558	0.338966
3	3	49	155.26	74.71	42.44	34.13	125.32	37.05	361.07	173.744	98.6977	79.3721	291.442	86.1628	0.295643
3	3	50	169.92	67.36	32.65	26.42	119.71	38.01	395.163	156.651	75.9302	61.4419	278.395	88.3953	0.317517
